# Supplementary material for: The analysis and validation of the prediction value of conventional and contrast-enhanced ultrasonography for BRAF mutant papillary thyroid microcarcinoma
Source: PubMed Central journal article supplement — Gland Surg. 2022 Oct;11(10):1683–96. doi: 10.21037/gs-22-493 (PMC9638797; doi:10.21037/gs-22-493), 2022-10
Supplement: gs-11-10-1683-dss.pdf [file gs-11-10-1683-dss.pdf]

## Data Sharing Statement

|                     |                                                                                                                                                     |                                                                                                                             |
|---------------------|-----------------------------------------------------------------------------------------------------------------------------------------------------|-----------------------------------------------------------------------------------------------------------------------------|
| <b>Article Info</b> | <a href="https://dx.doi.org/10.21037/gc-22-493">https://dx.doi.org/10.21037/gc-22-493</a>                                                           |                                                                                                                             |
| <b>Item</b>         | <b>Question</b>                                                                                                                                     | <b>Authors' Response<br/>(place "-" if not applicable)</b>                                                                  |
| 1                   | Would you like to share data collected for your study to others?                                                                                    | Yes.                                                                                                                        |
| 2                   | If not, would you like to share the reason for your decision?                                                                                       | -                                                                                                                           |
| 3                   | What data in particular will be shared?                                                                                                             | Clinical pathological and ultrasonic characteristics of involved cases will be shared.                                      |
| 4                   | Any other documents will be shared? Such as study protocol, statistical analysis plan, informed consent form, clinical study report, analytic code. | Study protocol will also be shared if requested.                                                                            |
| 5                   | When will data availability begin?                                                                                                                  | From the publication date.                                                                                                  |
| 6                   | When will data availability end?                                                                                                                    | One year within the publication date, since the technique in predicting genetic mutation may be updated over time.          |
| 7                   | To whom will you share the data?                                                                                                                    | General surgeons or radiologists who are interested in genetic mutation of thyroid cancer.                                  |
| 8                   | For what type of analysis or purpose?                                                                                                               | For analysis to evaluate the accuracy in predicting PTMC patients with BRAF mutation.                                       |
| 9                   | How or where can the data/documents be obtained?                                                                                                    | Emails could be sent to the address below to obtain the shared data: <a href="mailto:lhl8077@126.com">lhl8077@126.com</a> . |
| 10                  | Any other restrictions?                                                                                                                             | We may balance the potential benefits and risks for each request and then provide the data that could be shared.            |
